# 1 Analysis of Frailty in Peritoneal Dialysis Patients Based on Logistic 2 Regression Model and XGBoost Model

3  
4 Qi Liu<sup>a,†</sup>, Guanchao Tong<sup>b,c,†</sup>, Qiong Ye<sup>b,\*,†</sup>

5 <sup>a</sup> Wenzhou Central Hospital, 252 Baili East Rd, Lucheng, Wenzhou, Zhejiang Province  
6 325000, China

7 <sup>b</sup> Wenzhou-Kean University, 88 Daxue Rd, Ouhai, Wenzhou, Zhejiang Province 325060,  
8 China.

9 <sup>c</sup> Kean University, 1000 Morris Avenue, Union, New Jersey 07083, USA.

10 \* Corresponding author, e-mail: [yeqiong@wku.edu.cn](mailto:yeqiong@wku.edu.cn)

11 † These authors contributed equally to this work and should be considered co-first authors.

## 12 13 ABSTRACT:

14 **Purpose:** The aim of this study was to establish a model that would enable healthcare  
15 providers to use routine follow-up measures of peritoneal dialysis to predict frailty in those  
16 patients.

17  
18 **Design :** A cross-sectional design with Logistic regression and XGBoost machine learning  
19 algorithms analysis.

20  
21 **Methods:** One hundred and twenty-three cases of peritoneal dialysis patients who underwent  
22 regular follow-up at our center were included in this study. We use the FRAIL scale to  
23 confirm the frailty of the patients. Clinical and Laboratory data were obtained from the  
24 peritoneal dialysis registration system. Factors associated with patient Frailty were identified  
25 through regularized logistic regression and validated using an XGBoost model. The final  
26 selected variables were in-cluded in the unregularized Logistic Regression to construct the  
27 model

28  
29 **Findings:** A total of 123 patients were reviewed in this study, with an average age of 61.58  
30 years, and the median dialysis Duration was 38.5(18.07,60.53) months. 39 patients (31.71%)  
31 were female, 54 PD patients (43.9%) were classified as frail. Age, Ferritin, and TCH are the  
32 top three im-portant features labeled by the XGBoost. The results are consistent with the  
33 regularized logistic regression.

35 **Conclusions:** In this study, age, total cholesterol, and ferritin are the most important features  
36 associated with the frailty in peritoneal dialysis patients. This model can be used to predict  
37 frailty status and help health monitoring of peritoneal dialysis patients.

38

39 **Clinical Evidence:** Logistic regression and XGBoost machine learning algorithms can be  
40 used to construct a predictive model of frailty in peritoneal dialysis patients. The model could  
41 provide doctors with an objective tool to find frailty in peritoneal dialysis patients. As the data  
42 is obtained from routine examinations, the prediction model will not bring additional burden  
43 to the work of doctors or nurses.

44

45 **KEYWORDS:** peritoneal dialysis; frailty; FRAIL scale; Logistic Regression; XGBoost  
46 model

47

## 48 **INTRODUCTION**

49 Peritoneal dialysis can bring many benefits to patients with end-stage renal disease and  
50 prolongs their lives. However, it also has disadvantages, such as infections, metabolic and  
51 mechanical complications, risk of inadequate dialysis or limited possibilities to increase  
52 adequacy, malnutrition, long-term viability, psychological problems related to indwelling  
53 abdominal dialysis catheters, and fatigue from continuous use, particularly among elderly  
54 people[1].

55 Frailty is a commonly used term to denote a multidimensional syndrome of loss of  
56 reserves (energy, physical ability, cognition, health), which gives rise to vulnerability[2].  
57 Frailty is highly prevalent in older patients with dialysis-dependent kidney failure[3].

58 The causes of frailty in PD patients are a little more complex. The buildup of toxins in  
59 uremia can cause loss of appetite and fatigue. Among those undergoing dialysis, particularly  
60 peritoneal dialysis (PD), challenges such as abdominal distention and bloating can exacerbate  
61 the loss of appetite. This diminished appetite, combined with dietary restrictions and reduced  
62 physical activity, leads to protein-energy wasting, muscle breakdown, and the onset of  
63 sarcopenia[6], [7]. Elevated levels of uremic toxins in circulation and disruptions in acid-base  
64 balance contribute to chronic inflammation and hinder the effectiveness of anabolic  
65 hormones, ultimately resulting in catabolism and impaired energy utilization[6]. Moreover,  
66 dialysis removes uremic toxins and restores homeostasis, thus theoretically improving

67 weakness[7]. The interaction between malnutrition, inflammation, and frailty often coexist  
68 and have a combined effect on patient outcomes[8].

69 In patients with chronic kidney disease, both before or after dialysis initiation, frailty has  
70 been linked with increased risks of falls, hospitalization, cognitive dysfunction, and  
71 mortality[7], [9]. Early identification may enable timely intervention to prevent adverse  
72 health outcomes in this group of patients.

73 A significant amount of research has employed statistical learning and machine learning  
74 algorithms to address medical problems and identify relationships between various factors  
75 through patient observation and indicators of different diseases[10]. Machine learning can  
76 process large data sets and then efficiently process this data into clinical knowledge that  
77 enables physicians to prepare and deliver treatments, ultimately improving outcomes[11].  
78 Based on clinical data, machine learning models can diagnose aphasia, and urinary tract  
79 infections, and predict breast cancer, among others, providing clinicians with a "second  
80 opinion".

81 This study aims to analyze the relationship between frailty and various indicators  
82 (especially nutritional related) through the observation of patients with regular peritoneal  
83 dialysis follow-up in our center by using logistic regression and extreme Gradient Boost  
84 (XGBoost) algorithms and try to find out the important factors of frailty in patients with  
85 peritoneal dialysis, to intervene in the early stage and improve the quality of life of patients.

86

## 87 **MATERIALS AND METHODS**

### 88 **Participants**

89 A total of 123 patients with peritoneal dialysis followed up for more than 1 year were  
90 included in the study. The inclusion criteria were patients on maintenance PD and age >18  
91 years old, with basic listening, speaking, reading, and understanding skills. The exclusion  
92 criteria were patients with critical illness, unable to cooperate with the required actions,  
93 unable to understand the content of the scale, patients with acute infection, tumor patients, etc.

94 This study was approved by the Wenzhou Central Hospital Human Research Ethics  
95 Committee, and prior written consent was obtained from the Participants.

96

### 97 **Data collection**

98 The study started with registration on September 02, 2023. Trained and qualified nurses  
99 explained the study's purpose to patients and obtained their informed consent. They

100 administered the scale questions by reading them and recording the patient's responses.  
101 Researchers then reviewed the completed scales to ensure data accuracy and consistency.  
102 Clinical and Laboratory data were obtained from the peritoneal dialysis registration  
103 system.

104

### 105 **Assessment of Frailty**

106 The FRAIL scale includes 5 components: Fatigue, Resistance, Ambulation (slow  
107 walking speed), Illness, and Loss of Weight (5% or more in the previous year). Frail scale  
108 scores range from 0–5 (i.e., 1 point for each component; 0=best to 5=worst) and represent  
109 frail (3–5), pre-frail (1–2), and robust (0) health status[12]. The FRAIL scale has been  
110 recommended by the latest international guidelines as the best screening tool for Frailty[13].  
111 In a study of HD (hemodialysis) patients, the FRAIL scale proved to be an easy-to-apply tool,  
112 identifying a high prevalence of frailty and being a predictor of hospital admission[14]. In this  
113 study, we combine frail and pre-frail, classify 1-5 as frail, and 0 as non-frail status.

114

### 115 **Logistic Regression model**

116 Logistic regression is a widely used classification algorithm that uses a linear model to  
117 predict the probability of a binary outcome[24]. The model of the binary logistic regression is  
118 a linear regression of the log odds which can be expressed as[15]:

$$\text{logit}(p) = \log\left(\frac{p}{1-p}\right) = \beta_0 + \sum \beta_i x_i$$

119 It is a simple and effective way to model binary data, but it can sometimes suffer from  
120 overfitting. The loss function of the Overfitted models will fail to replicate in future samples,  
121 thus creating considerable uncertainty about the scientific merit of the finding[16].  
122 Regularization is a technique used to avoid overfitting in machine learning models. The lasso,  
123 ridge, and elastic net are popular regularized regression models for supervised learning[17].  
124 Elastic Net regularization combines L1 (Lasso) and L2 (Ridge) regularization by adding a  
125 penalty term to the objective function that is a combination of the absolute value and square  
126 of the coefficients. The loss function of the elastic net model can be expressed as[18]:

$$L + \lambda \left(\frac{1-\alpha}{2}\right) \sum \beta_i^2 + \alpha \sum |\beta_i|$$

127

128 In the loss function, the value of the  $\alpha$  controls the mix of the lasso and ridge regression.  
129 When  $\alpha = 0$ , it becomes the pure ridge regression, and when  $\alpha = 1$ , it is the pure lasso  
130 regression.

131

## 132 **XGBoost Model**

133 XGBoost was mainly designed for speed and performance using gradient-boosted  
134 decision trees. It represents a way for machine boosting, or in other words, applying boosting  
135 to machines[19]. It is based on the sparsity-aware algorithm and weighted quantile sketch,  
136 which can converge the weak learners step-wisely into the ensemble to form a strong learner.  
137 Overfitting also can be reduced largely in the XGBoost model through parallel calculation and  
138 regularization lifting technology[20].

139

## 140 **Data Analysis**

141 IBM SPSS Statistics 25 and R-Studio software (version 4.3.2) were used for data  
142 analysis. The Continuous data were expressed in different ways according to the results of  
143 normal tests, mean  $\pm$  standard deviation, or median (interquartile range). The count data were  
144 expressed as the percentage of cases. Regularized Logistic Regression analysis was used to  
145 filter the effective variables for the frailty. The variables with non-zero regression coefficients  
146 would be included in the final model. The importance of the prediction model variables was  
147 ranked by XGBoost, by which the results of Regularized Logistic Regression analysis would  
148 be verified. The final selected variables were included in the unregularized Logistic  
149 Regression to construct the model (Figure 1).

150

## 151 **RESULTS**

### 152 **Participants and Baseline Frailty Status**

153 A total of 123 patients were reviewed in this study, with an average age of  $(61.58 \pm 12.8)$   
154 years, and the median dialysis Duration was  $38.5(18.07,60.53)$  months. 39 patients (31.71%)  
155 were female, 54 patients with original kidney disease (43.9%) were hypertensive  
156 nephropathy, and 54 PD patients (43.9%) were classified as frail(Table 1).

157

### 158 **Regularized Logistic Regression Results and Verified by XGBoost**

159 Using the Regularized Logistic Regression algorithm with optimal parameters  
160 ( $\text{Alpha}=0.5$ ,  $\text{lambda}=0.15$ ), three significant factors associated with frailty occurrence in PD

161 patients, each with non-zero coefficients, were selected from clinical data. As shown in the  
162 Table 2, the three most important factors are Age, Total Cholesterol, and Ferritin.

163

164 Using the XGBoost algorithm with optimal parameters ( $\text{max\_depth} = 4$ ,  $\text{verbose} = 0$ ,  
165  $\text{nrounds} = 20$ ). The factors are ranked by importance from XGBoost as shown in Table 3 and  
166 Figure 2. Table 3 shows the three measures: Gain, Cover, and Frequency in the variable  
167 importance matrix [19]. The Gain implies the relative contribution of the corresponding  
168 feature to the model. The Cover shows the relative number of observations related to the  
169 corresponding feature. Moreover, The Frequency represents the percentage of times a  
170 particular feature occurs in the model. The Gain is the most relevant attribute for interpreting  
171 the relative importance of each feature[19]. Figure 2 shows the visualization of the Gain of  
172 the different features.

173 The top three features in the Gain column, Age, Total Cholesterol, and Ferritin, are  
174 consistent with the results of the regularized logistic regression model.

175

### 176 **Unregularized Logistic Regression**

177 After applying the regularized logistic regression and being verified by XGBoost, we  
178 determined that age, total cholesterol, and ferritin are the three significant factors associated  
179 with the occurrence of frailty in PD patients. Then, we use the unregularized Logistic  
180 Regression to obtain the relationship between the three variables and the occurrence of frailty.

181 Based on the results of Unregularized Logistic Regression, a frailty prediction model for  
182 PD patients was established using three independent predictive factors: age, total cholesterol  
183 (TCH), and ferritin. The prediction model is as follows:

184

$$\text{logit}(p) = -3.0444 + 0.0664 \times \text{Age} - 0.2157 \times \text{TCH} - 0.003 \times \text{Ferritin}$$

185

186 , where  $\text{logit}(p)$  is equal to the log-odds of the  $p$ , which is  $\log\left(\frac{p}{1-p}\right)$ .

187 In the model above, the  $p$  is the probability of frailty. The model above shows that  
188 increasing one unit (year) of the age will result in a 0.0664 increase in  $\text{logit}(p)$ , which means  
189 there is a 6.8% increase in the odd of probability of frailty. Increasing one unit (mmol/L) of  
190 the TCH will result in a 0.2157 decrease in  $\text{logit}(p)$ , which means there is a 19.4% decrease in  
191 the odd of the probability of frailty. Increasing one unit (ug/L) of the Ferritin will result in a

192 0.003 decrease in logit(p), which means there is a 0.30% decrease in the odd of the probability  
193 of frailty.

194

195 The area under the receiver operating characteristic curve (AUC) for the unregularized  
196 logistic regression model is 0.736 as shown in Figure 3. The model shows a positive  
197 association between age and frailty, while total cholesterol and ferritin are negatively  
198 associated with the development of frailty.

199

## 200 **DISCUSSION**

201 We found that 43.9% of peritoneal dialysis patients from our data had different levels of  
202 frailty based on the FRAIL scale. The main related factors for frailty are age, total cholesterol,  
203 and ferritin.

204 In this study, age was the most important factor for frailty in both logistic regression and  
205 importance analysis with XGBoost, which is consistent with previous studies[21], [22]  
206 (Figure 2). While the biological causative mechanisms of frailty are different from those  
207 processes causing the aging process, age is still the most important factor affecting frailty.  
208 With aging, one or more physiological systems change especially the neuro-muscular,  
209 neuroendocrine, and immune systems[23]. These changes interact and accumulate, decreasing  
210 physiological function and reserve. Frailty is thought to result when damage to multiple  
211 physiological systems exceeds a threshold so much that repair mechanisms fail to maintain  
212 system homeostasis[22], [24]. Peritoneal dialysis patients often face a lot of health challenges,  
213 such as malnutrition, metabolic disorders, and cardiovascular disease[8]. Peritoneal dialysis  
214 may affect patients' physiological function, immune system function, mental health, and  
215 quality of life[1], [25]. The patients often have chronic diseases such as diabetes and  
216 hypertension. Peritoneal dialysis patients would be sensitive to the age-related features, such  
217 that the effect of age on frailty may be exacerbated.

218 Too much cholesterol could increase the risk of heart disease, stroke, and pancreatitis.  
219 However, the low cholesterol is also related to nutrition, infections, tumors, and liver  
220 disease[26], [27]. For patients on regular dialysis, the lower total cholesterol is usually due to  
221 malnutrition and inflammation[28]. A cross-sectional study in older adults found being at a  
222 high level of TCH was associated with a lower risk of frailty. A low TCH level might be the  
223 most associated with frailty risk[29]. People with lower TCH ( $\leq 5.2$  mmol/l) were more likely  
224 to decline in functional status compared to others with higher TCH[27]. The complex effects

225 of cholesterol may be related to age. A report showed high midlife TCH is a risk factor for  
226 subsequent dementia/Alzheimer's disease, but decreasing TCH after midlife may reflect  
227 ongoing disease processes and may represent a risk marker for late-life cognitive  
228 impairment[30]. Additionally, other studies show that total TCH is inversely associated with  
229 mortality as a metabolic shift and reverse metabolism as well[31], [32]. Hypocholesterolemia  
230 was associated not only with an increased risk of mortality but also with an increased rate of  
231 complications (especially infections), clear biochemical evidence of malnutrition, and higher  
232 duration and cost of hospitalization[33]. In our study, the total cholesterol of the patients was  
233 4.26(1.54)mmol/L, and only 15 percent were above the upper limit of normal. Because the  
234 overall TCH level is not high, this may be the reason why the lower the TCH, the higher the  
235 risk of frailty in our study.

236 Ferritin is an important iron storage protein in the human body and participates in the  
237 regulation of hematopoietic and immune systems. Ferritin levels can reflect the iron reserve  
238 and nutritional status of the body, and it is related to a variety of diseases[34], [35].  
239 We found a relationship between ferritin and frailty. A cross-sectional study in a tertiary care  
240 center also showed ferritin was an independent significant predictor of frailty[36]. The effect  
241 of ferritin on frailty may be related to factors including anemia, oxygen supply, aerobic  
242 metabolism, inflammation, immune response, and malnutrition [37], [38].

243 As people age, frailty has long been considered a state that accelerates the risk of adverse  
244 outcomes. Frailty is more common in patients with uremia and peritoneal dialysis[7].  
245 Identifying biomarkers associated with frailty may benefit the care of peritoneal dialysis  
246 patients. Our center's routine follow-up of peritoneal dialysis patients includes the complete  
247 blood count (CBC), Biochemistry Panel, and other indicators. Compared to frailty assessment  
248 scales such as FRAIL and FSQ(Frailty Screening Questionnaire), which include subjective  
249 questions about fatigue, stair climbing difficulties, and community ambulation[39], [40], these  
250 biochemical indicators are easy to obtain, stable, and objectives.

251 Our results may help to improve the ability to identify those adults at greatest risk of  
252 frailty in the management of peritoneal dialysis patients and provide early intervention  
253 afterward. We should pay attention to the age, total cholesterol, and ferritin levels during  
254 routine examinations of peritoneal dialysis patients. Patients with frailty risk can be further  
255 examined with a frailty scale to improve the accuracy of the diagnosis (such as the FRAIL  
256 scale).



257           However, some indicators that have diagnostic significance for frailty in other articles  
258 were not screened out in this study (such as albumin, hemoglobin, etc.) [36], [41]. The reason  
259 may be that our sample size is too small. Therefore, in the future, we plan to expand the  
260 sample size and use big data analytics to train and refine this model, and use the model to  
261 detect the peritoneal dialysis patients. The model could provide doctors with an objective tool  
262 to diagnose frailty in peritoneal dialysis patients. As the data is obtained from routine  
263 examinations, the prediction model will not bring additional burden to the work of doctors or  
264 nurses.

265

## 266 **CONCLUSION**

267           In this study, age, total cholesterol, and ferritin are the most important features associated  
268 with the frailty in peritoneal dialysis patients. This model can be used to predict frailty status  
269 and help health monitoring of peritoneal dialysis patients. In the future, we will collect more  
270 data to verify and improve the accuracy of the model.

271

272

273 *Funding:* This work was supported by Wenzhou-Kean University 2023 Internal  
274 (Faculty/Staff) Start-Up Research Grant, under ISRG2023023.

275

276 *Institutional Review Board Statement:* The study was conducted in accordance with the Dec-  
277 laration of Helsinki and approved by Wenzhou Central Hospital.

278

279 *Informed Consent Statement:* Written informed consent has been obtained from the patients to  
280 publish this paper.

281

282 *Data Availability Statement:* Dataset available on request from the authors

283

284 *Conflicts of Interest:* The authors declare no conflicts of interest.

285

286

287

## 288 **REFERENCES**

289 [1] R. Gokal and N. P. Mallick, "Peritoneal dialysis," *The Lancet*, vol. 353, no. 9155, pp.  
290 823–828, Mar. 1999, doi: 10.1016/S0140-6736(98)09410-0.

- 291 [2] K. Rockwood *et al.*, “A global clinical measure of fitness and frailty in elderly people,”  
292 *CMAJ*, vol. 173, no. 5, pp. 489–495, Aug. 2005, doi: 10.1503/cmaj.050051.
- 293 [3] M. G. Shlipak *et al.*, “The presence of frailty in elderly persons with chronic renal  
294 insufficiency,” *American Journal of Kidney Diseases*, vol. 43, no. 5, pp. 861–867, May  
295 2004, doi: 10.1053/j.ajkd.2003.12.049.
- 296 [4] G. C.-K. Chan, J. K.-C. Ng, P. M.-S. Cheng, K.-M. Chow, C.-C. Szeto, and P. K.-T. Li,  
297 “Dietary Micronutrient Intake and Its Relationship with the Malnutrition–Inflammation–  
298 Frailty Complex in Patients Undergoing Peritoneal Dialysis,” *Nutrients*, vol. 15, no. 23,  
299 Art. no. 23, Jan. 2023, doi: 10.3390/nu15234934.
- 300 [5] J. J. Carrero *et al.*, “Muscle atrophy, inflammation and clinical outcome in incident and  
301 prevalent dialysis patients,” *Clinical Nutrition*, vol. 27, no. 4, pp. 557–564, Aug. 2008,  
302 doi: 10.1016/j.clnu.2008.04.007.
- 303 [6] D. Fouque *et al.*, “A proposed nomenclature and diagnostic criteria for protein-energy  
304 wasting in acute and chronic kidney disease,” *Kidney Int*, vol. 73, no. 4, pp. 391–398,  
305 Feb. 2008, doi: 10.1038/sj.ki.5002585.
- 306 [7] G. C.-K. Chan *et al.*, “Progression in Physical Frailty in Peritoneal Dialysis Patients,”  
307 *Kidney and Blood Pressure Research*, vol. 46, no. 3, pp. 342–351, May 2021, doi:  
308 10.1159/000515635.
- 309 [8] G. C.-K. Chan, W. W.-S. Fung, C.-C. Szeto, and J. K.-C. Ng, “From MIA to FIFA: The  
310 vicious matrix of frailty, inflammation, fluid overload and atherosclerosis in peritoneal  
311 dialysis,” *Nephrology (Carlton)*, vol. 28, no. 4, pp. 215–226, Apr. 2023, doi:  
312 10.1111/nep.14150.
- 313 [9] G. C.-K. Chan *et al.*, “Polypharmacy Predicts Onset and Transition of Frailty,  
314 Malnutrition, and Adverse Outcomes in Peritoneal Dialysis Patients,” *The Journal of*  
315 *nutrition, health and aging*, vol. 26, no. 12, pp. 1054–1060, Dec. 2022, doi:  
316 10.1007/s12603-022-1859-8.
- 317 [10] J. Song, G. Tong, and W. Zhu, “A Detecting System for Abrupt Changes in Temporal  
318 Incidence Rate of COVID-19 and Other Pandemics,” *Stats*, vol. 6, no. 3, Art. no. 3, Sep.  
319 2023, doi: 10.3390/stats6030058.
- 320 [11] K. A. Bhavsar, J. Singla, Y. D. Al-Otaibi, O. Y. Song, Y. B. Zikria, and A. K. Bashir,  
321 “Medical diagnosis using machine learning: a statistical review,” *Computers, Materials*  
322 *and Continua*, vol. 67, no. 1, Art. no. 1, Jan. 2021.
- 323 [12] J. Woo, R. Yu, M. Wong, F. Yeung, M. Wong, and C. Lum, “Frailty Screening in the  
324 Community Using the FRAIL Scale,” *J Am Med Dir Assoc*, vol. 16, no. 5, pp. 412–419,  
325 May 2015, doi: 10.1016/j.jamda.2015.01.087.
- 326 [13] E. Dent *et al.*, “Physical Frailty: ICFSR International Clinical Practice Guidelines for  
327 Identification and Management,” *The Journal of nutrition, health and aging*, vol. 23, no.  
328 9, pp. 771–787, Nov. 2019, doi: 10.1007/s12603-019-1273-z.
- 329 [14] E. M. S. Barbosa *et al.*, “Comparison between FRAIL Scale and Clinical Frailty Scale in  
330 predicting hospitalization in hemodialysis patients,” *J Nephrol*, vol. 36, no. 3, pp. 687–  
331 693, Apr. 2023, doi: 10.1007/s40620-022-01532-5.
- 332 [15] M. P. LaValley, “Logistic Regression,” *Circulation*, vol. 117, no. 18, pp. 2395–2399,  
333 May 2008, doi: 10.1161/CIRCULATIONAHA.106.682658.
- 334 [16] M. A. Babyak, “What You See May Not Be What You Get: A Brief, Nontechnical  
335 Introduction to Overfitting in Regression-Type Models,” *Psychosomatic Medicine*, vol.  
336 66, no. 3, p. 411, Jun. 2004.
- 337 [17] J. Friedman, T. Hastie, and R. Tibshirani, “Regularization Paths for Generalized Linear  
338 Models via Coordinate Descent,” *J Stat Softw*, vol. 33, no. 1, pp. 1–22, 2010.

- 339 [18] J. K. Tay, B. Narasimhan, and T. Hastie, “Elastic Net Regularization Paths for All  
340 Generalized Linear Models,” *J Stat Softw*, vol. 106, p. 1, 2023, doi:  
341 10.18637/jss.v106.i01.
- 342 [19] T. Chen and C. Guestrin, “XGBoost: A Scalable Tree Boosting System,” in *Proceedings*  
343 *of the 22nd ACM SIGKDD International Conference on Knowledge Discovery and Data*  
344 *Mining*, in KDD ’16. New York, NY, USA: Association for Computing Machinery,  
345 Aug. 2016, pp. 785–794. doi: 10.1145/2939672.2939785.
- 346 [20] Y. Zhang *et al.*, “Comparison of Prediction Models for Acute Kidney Injury Among  
347 Patients with Hepatobiliary Malignancies Based on XGBoost and LASSO-Logistic  
348 Algorithms,” *International Journal of General Medicine*, vol. 14, pp. 1325–1335, Apr.  
349 2021, doi: 10.2147/IJGM.S302795.
- 350 [21] J. K.-C. Ng *et al.*, “Frailty in Chinese Peritoneal Dialysis Patients: Prevalence and  
351 Prognostic Significance,” *Kidney and Blood Pressure Research*, vol. 41, no. 6, pp. 736–  
352 745, Oct. 2016, doi: 10.1159/000450563.
- 353 [22] L. P. Fried *et al.*, “Frailty in Older Adults: Evidence for a Phenotype,” *The Journals of*  
354 *Gerontology: Series A*, vol. 56, no. 3, pp. M146–M157, Mar. 2001, doi:  
355 10.1093/gerona/56.3.M146.
- 356 [23] J. Walston *et al.*, “Research agenda for frailty in older adults: toward a better  
357 understanding of physiology and etiology: summary from the American Geriatrics  
358 Society/National Institute on Aging Research Conference on Frailty in Older Adults,” *J*  
359 *Am Geriatr Soc*, vol. 54, no. 6, pp. 991–1001, Jun. 2006, doi: 10.1111/j.1532-  
360 5415.2006.00745.x.
- 361 [24] A. Clegg, J. Young, S. Iliffe, M. O. Rikkert, and K. Rockwood, “Frailty in elderly  
362 people,” *The Lancet*, vol. 381, no. 9868, pp. 752–762, Mar. 2013, doi: 10.1016/S0140-  
363 6736(12)62167-9.
- 364 [25] S.-M. Kim *et al.*, “Comparison of hemodialysis and peritoneal dialysis patients’ dietary  
365 behaviors,” *BMC Nephrology*, vol. 21, Mar. 2020, doi: 10.1186/s12882-020-01744-6.
- 366 [26] J. Wang and Z. Hong, “Low Plasma Total Cholesterol Concentration: A Sensitive  
367 Evaluation Marker in Hospitalized Patients with Nutritional Deficiency Malnutrition,”  
368 *JFNR*, vol. 2, no. 9, pp. 551–555, Aug. 2014, doi: 10.12691/jfnr-2-9-4.
- 369 [27] B. W. M. Schalk, M. Visser, D. J. H. Deeg, and L. M. Bouter, “Lower levels of serum  
370 albumin and total cholesterol and future decline in functional performance in older  
371 persons: the Longitudinal Aging Study Amsterdam,” *Age Ageing*, vol. 33, no. 3, pp.  
372 266–272, May 2004, doi: 10.1093/ageing/afh073.
- 373 [28] Y. Liu *et al.*, “Association Between Cholesterol Level and Mortality in Dialysis  
374 Patients Role of Inflammation and Malnutrition,” *JAMA*, vol. 291, no. 4, pp. 451–459,  
375 Jan. 2004, doi: 10.1001/jama.291.4.451.
- 376 [29] M. Yin *et al.*, “Cholesterol alone or in combination is associated with frailty among  
377 community-dwelling older adults: A cross-sectional study,” *Exp Gerontol*, vol. 180, p.  
378 112254, Sep. 2023, doi: 10.1016/j.exger.2023.112254.
- 379 [30] A. Solomon *et al.*, “Serum cholesterol changes after midlife and late-life cognition,”  
380 *Neurology*, vol. 68, no. 10, pp. 751–756, Mar. 2007, doi:  
381 10.1212/01.wnl.0000256368.57375.b7.
- 382 [31] A. H. Abdelhafiz, B. E. Loo, N. Hensey, C. Bailey, and A. Sinclair, “The U-shaped  
383 Relationship of Traditional Cardiovascular Risk Factors and Adverse Outcomes in Later  
384 Life,” *Aging Dis*, vol. 3, no. 6, pp. 454–464, Oct. 2012.
- 385 [32] U. M. Vischer *et al.*, “Cardiometabolic determinants of mortality in a geriatric  
386 population: Is there a ‘reverse metabolic syndrome’?,” *Diabetes & Metabolism*, vol. 35,  
387 no. 2, pp. 108–114, Apr. 2009, doi: 10.1016/j.diabet.2008.08.006.

- 388 [33] P. Ranieri, R. Rozzini, S. Franzoni, P. Barbisoni, and M. Trabucchi, “Serum Cholesterol  
389 Levels as a Measure of Frailty in Elderly Patients,” *Experimental Aging Research*, vol.  
390 24, no. 2, pp. 169–179, Mar. 1998, doi: 10.1080/036107398244300.
- 391 [34] W. Wang, M. A. Knovich, L. G. Coffman, F. M. Torti, and S. V. Torti, “Serum ferritin:  
392 Past, present and future,” *Biochim Biophys Acta*, vol. 1800, no. 8, pp. 760–769, Aug.  
393 2010, doi: 10.1016/j.bbagen.2010.03.011.
- 394 [35] M. N. Garcia-Casal, S.-R. Pasricha, R. X. Martinez, L. Lopez-Perez, and J. P. Peña-  
395 Rosas, “Serum or plasma ferritin concentration as an index of iron deficiency and  
396 overload,” *Cochrane Database of Systematic Reviews*, no. 5, 2021, doi:  
397 10.1002/14651858.CD011817.pub2.
- 398 [36] A. Kumar, M. Dhar, M. Agarwal, A. Mukherjee, and V. Saxena, “Predictors of Frailty in  
399 the Elderly Population: A Cross-Sectional Study at a Tertiary Care Center,” *Cureus*, vol.  
400 14, no. 10, p. e30557, Oct. 2022, doi: 10.7759/cureus.30557.
- 401 [37] C. Dugan, K. Cabolis, L. F. Miles, and T. Richards, “Systematic review and meta-  
402 analysis of intravenous iron therapy for adults with non-anaemic iron deficiency: An  
403 abridged Cochrane review,” *J Cachexia Sarcopenia Muscle*, vol. 13, no. 6, pp. 2637–  
404 2649, Dec. 2022, doi: 10.1002/jcsm.13114.
- 405 [38] O. A. Abulseoud *et al.*, “Attenuated initial serum ferritin concentration in critically ill  
406 coronavirus disease 2019 geriatric patients with comorbid psychiatric conditions,” *Front*  
407 *Psychiatry*, vol. 13, p. 1035986, 2022, doi: 10.3389/fpsyt.2022.1035986.
- 408 [39] K.-U. Saum, H. Müller, C. Stegmaier, K. Hauer, E. Raum, and H. Brenner,  
409 “Development and Evaluation of a Modification of the Fried Frailty Criteria Using  
410 Population-Independent Cutpoints,” *Journal of the American Geriatrics Society*, vol. 60,  
411 no. 11, pp. 2110–2115, 2012, doi: 10.1111/j.1532-5415.2012.04192.x.
- 412 [40] I. Palomo *et al.*, “Characterization by Gender of Frailty Syndrome in Elderly People  
413 according to Frail Trait Scale and Fried Frailty Phenotype,” *Journal of Personalized*  
414 *Medicine*, vol. 12, no. 5, Art. no. 5, May 2022, doi: 10.3390/jpm12050712.
- 415 [41] K. Jayanama, O. Theou, J. M. Blodgett, L. Cahill, and K. Rockwood, “Frailty, nutrition-  
416 related parameters, and mortality across the adult age spectrum,” *BMC Med*, vol. 16, no.  
417 1, p. 188, Oct. 2018, doi: 10.1186/s12916-018-1176-6.

418

419

420

421

422

423

424

425

426

427

428

429

430

431

432

433

434  
435  
436  
437  
438  
439  
440  
441  
442  
443  
444  
445  
446

**Table 1** Patient demographics. There are a total of one hundred and twenty-three patients in the dataset, of which forty-five Peritoneal Dialysis (PD) patients were frail.

| Variable                               | All patients   | Not frail     | Frail         |
|----------------------------------------|----------------|---------------|---------------|
| Number                                 | 123            | 69            | 54            |
| Gender (%)                             |                |               |               |
| Male                                   | 84(68.29)      | 50(72.46)     | 34(62.97)     |
| Female                                 | 39(31.71)      | 19(27.54)     | 20(37.04)     |
| Education level (%)                    |                |               |               |
| Never go to school                     | 19(15.45)      | 9(13.04)      | 10(18.52)     |
| Primary school                         | 54(43.90)      | 27(39.13)     | 27(50.00)     |
| Junior school                          | 33(26.83)      | 20(28.99)     | 13(24.07)     |
| High school                            | 13(10.57)      | 11(15.94)     | 2(3.70)       |
| College degree or above                | 4(3.25)        | 2(2.90)       | 2(3.70)       |
| Primary Diagnosis of Renal Disease (%) |                |               |               |
| Hypertension                           | 54(43.90)      | 34(49.28)     | 20(37.04)     |
| Diabetes                               | 50(40.65)      | 22(31.88)     | 28(51.85)     |
| Chronic Glomerulonephritis             | 15(12.20)      | 9(13.04)      | 6(11.11)      |
| Others                                 | 4(3.25)        | 4(5.80)       | 0(0)          |
| Age(year)                              | 61.58±12.56    | 57.94±11.78   | 66.56±11.68   |
| Dialysis Duration (months)             | 38.50(42.46)   | 36.63(43.74)  | 38.00(36.72)  |
| Vitamin D(nmol/L)                      | 42.20(20.90)   | 41.50(21.60)  | 42.55(20.50)  |
| HB(Hemoglobin)(g/L)                    | 113.20±17.32   | 114.00±19.22  | 112.44±14.79  |
| Albumin(g/L)                           | 34.7(4.8)      | 34.75(4.8)    | 34.1(5.0)     |
| TCH(Total Cholesterol)(mmol/L)         | 4.26(1.54)     | 4.38(1.96)    | 4.04(1.62)    |
| TG(Triglyceride)(mmol/L)               | 2.09(1.59)     | 2.05(1.82)    | 2.08(1.54)    |
| Ca(mmol/L)                             | 2.32(0.21)     | 2.30±0.20     | 2.33±0.17     |
| PTH(Parathyroid Hormone)(pg/mL)        | 198.50(330.75) | 200.00(300)   | 193.50(362)   |
| Prealbumin(mg/L)                       | 335.00±143     | 350.85±102.80 | 345.98±108.66 |
| Iron saturation                        | 0.23(0.17)     | 0.21(0.19)    | 0.25(0.16)    |
| Ferritin(ug/L)                         | 78.70(119.40)  | 99.80(163.7)  | 63.35(97.2)   |
| β2-microglobulin(mg/L)                 | 36.55(20.25)   | 38.64(18.05)  | 34.42(23.99)  |
| Transferrin(g/L)                       | 2.49(0.93)     | 2.45(1.07)    | 2.54(0.79)    |

447  
448  
449  
450  
451  
452  
453  
454  
455  
456  
457  
458  
459  
460  
461  
462

**Table 2** The Importance and the Coefficients for the Regularized Model. We find three variables are significantly related to the frailty occurrence in PD patients: Age, Total Cholesterol, and Ferritin.

| Variable          | Variable Importance | Coefficients* |
|-------------------|---------------------|---------------|
| Gender            | 0                   | 0             |
| Age               | 0.0252664469        | 0.0252608776  |
| Dialysis Duration | 0                   | 0             |
| Education.Level   | 0                   | 0             |
| Protopathy        | 0                   | 0             |
| Vitamin D         | 0                   | 0             |
| HB                | 0                   | 0             |
| Albumin           | 0                   | 0             |
| TCH               | 0.0016228674        | -0.0015955269 |
| TG                | 0                   | 0             |
| Ca                | 0                   | 0             |
| PTH               | 0                   | 0             |
| Prealbumin        | 0                   | 0             |
| Iron saturation   | 0                   | 0             |
| Ferritin          | 0.0001208403        | -0.0001204672 |
| β2-microglobulin  | 0                   | 0             |
| Transferrin       | 0                   | 0             |

463 \*The Intercept is -1.7843008324  
464

465 **Table 3** The Importance Matrix of the Variables from XGBoost There are three measures:  
466 Gain, Cover and Frequency in the variable importance matrix The Gain is the most relevant  
467 attribute for interpreting the relative importance of each feature.  
468

| Variable | Gain       | Cover      | Frequency  |
|----------|------------|------------|------------|
| Age      | 0.17481068 | 0.08966518 | 0.09302326 |

|                   |            |            |            |
|-------------------|------------|------------|------------|
| Ferritin          | 0.15382618 | 0.06178086 | 0.07441860 |
| TCH               | 0.08037195 | 0.04529906 | 0.06511628 |
| HB                | 0.07744565 | 0.06675650 | 0.06976744 |
| Vitamin D         | 0.07142420 | 0.07784804 | 0.06511628 |
| TG                | 0.06544205 | 0.04840883 | 0.07441860 |
| Iron.saturation   | 0.05993071 | 0.06914067 | 0.06046512 |
| PTH               | 0.05386862 | 0.04312221 | 0.04186047 |
| Ca                | 0.05379215 | 0.11827511 | 0.07906977 |
| β2-microglobulin  | 0.05291816 | 0.09049445 | 0.06511628 |
| transferrin       | 0.03860538 | 0.03130507 | 0.05581395 |
| Albumin           | 0.03137946 | 0.05763450 | 0.05116279 |
| Prealbumin        | 0.03117914 | 0.06748212 | 0.06046512 |
| Protopathy        | 0.02292476 | 0.06530528 | 0.02790698 |
| Dialysis Duration | 0.02013171 | 0.02726236 | 0.05116279 |
| Education Level   | 0.00622742 | 0.01585985 | 0.02790698 |
| Gender            | 0.00572177 | 0.02435990 | 0.03720930 |

469

470

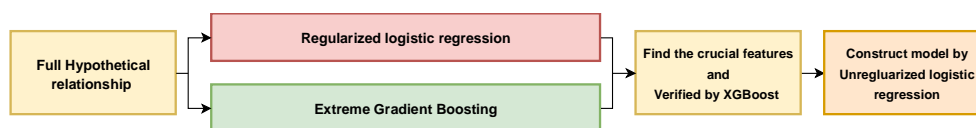

471

472

473

474

475

476

477

478

**Figure 1** Flow Chart of the procedure: Regularized logistic regression analysis and the XGBoost model were used to screen variables. The three features significantly related to the frail were filtered by regularized logistic regression and are the top three important variables in the XGBoost importance. The results from regularized logistic regression and XGBoost are consistent. The unregularized logistic regression was used to construct the prediction model for the frail.

### Visualization of the XGBoost Variable Importance

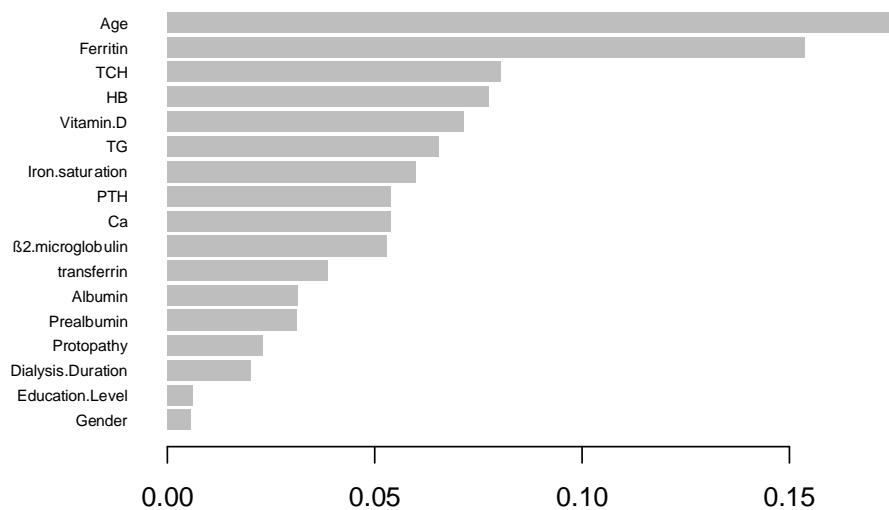

479  
480 **Figure 2** *XGBoost Variable Importance Plot*: The Variable importance (Gain) of the  
481 XGBoost. Age, Ferritin, and TCH are the top three important features labeled by the  
482 XGBoost. The results are consistent with the regularized logistic regression.  
483

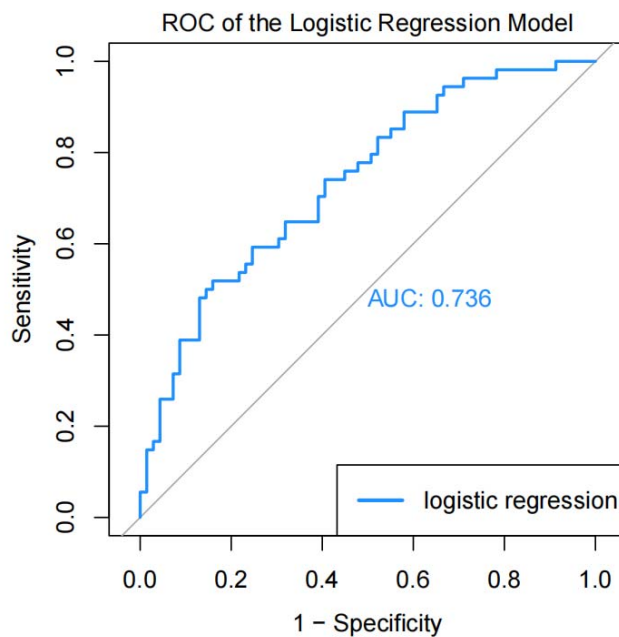

484  
485 **Figure 3** *The ROC of the Unregularized Logistic Regression Model*: The AUC for the  
486 unregularized logistic regression model is 0.736  
487



488

489

490

491

492

493

494

495

496

497
